# Supplementary material for: Triangular-shaped homologous heterostructure as photocatalytic H2S scavenger and macrophage modulator for rheumatoid arthritis therapy
Source: Royal Society of Chemistry journal article supplement (doi:10.1039/d2tb01650h), 2022-01-01

## Supplementary data for western blot

### Triangular-shaped homologous heterostructure as photocatalytic H<sub>2</sub>S scavenger and macrophage modulator for Rheumatoid Arthritis therapy

Ziqiao Ding<sup>a</sup>, Wen Li<sup>a</sup>, Yunsheng Dou<sup>a</sup>, Yue Zhou<sup>a</sup>, Yingzi Ren<sup>a</sup>, Huaqing Jing<sup>a</sup>,

Xiaoyang Liang<sup>a</sup>, Xinxing Wang<sup>b, \*\*</sup>, Nan Li<sup>a, \*</sup>

<sup>a</sup> *Tianjin Key Laboratory of Drug Delivery & High-Efficiency, School of Pharmaceutical  
Science and Technology, Tianjin University, 92 Weijin Road, Nankai District, 300072,  
Tianjin, P. R. China.*

<sup>b</sup> *Tianjin Institute of Environmental and Operational Medicine, 1 Dali Road, Heping  
District, 300050, Tianjin, P. R. China*

**Figure 4C**

ARG-1

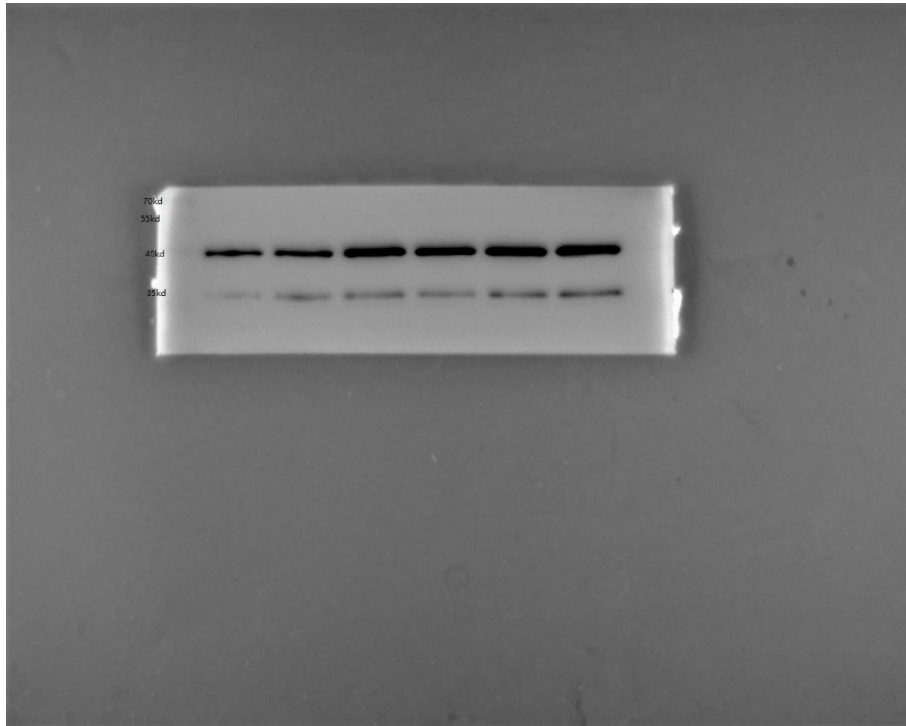

iNOS

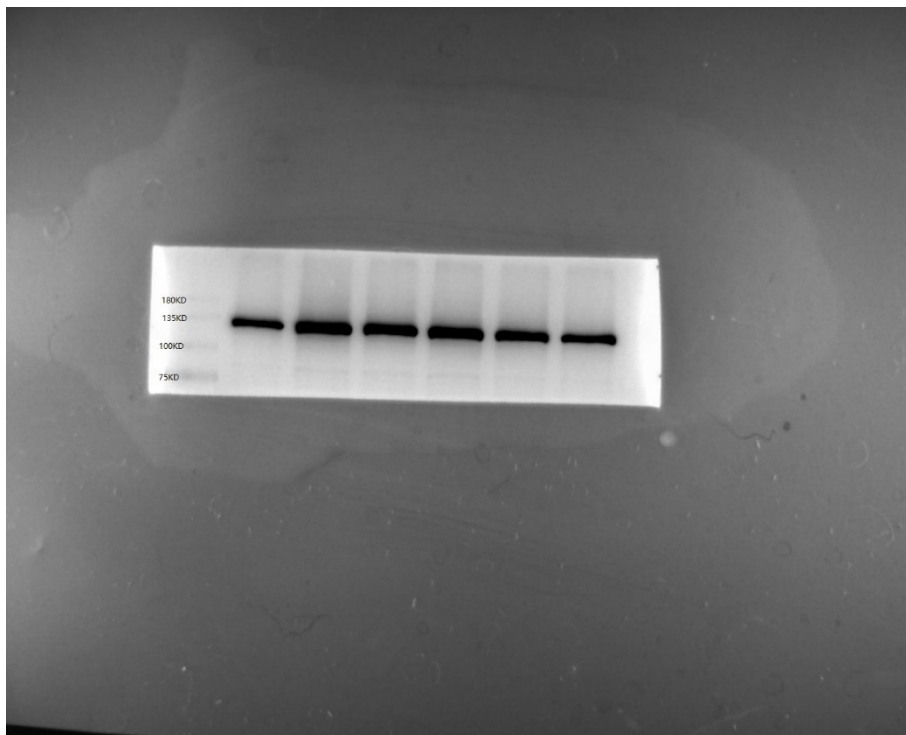

**Figure 4G**

$\beta$ -actin

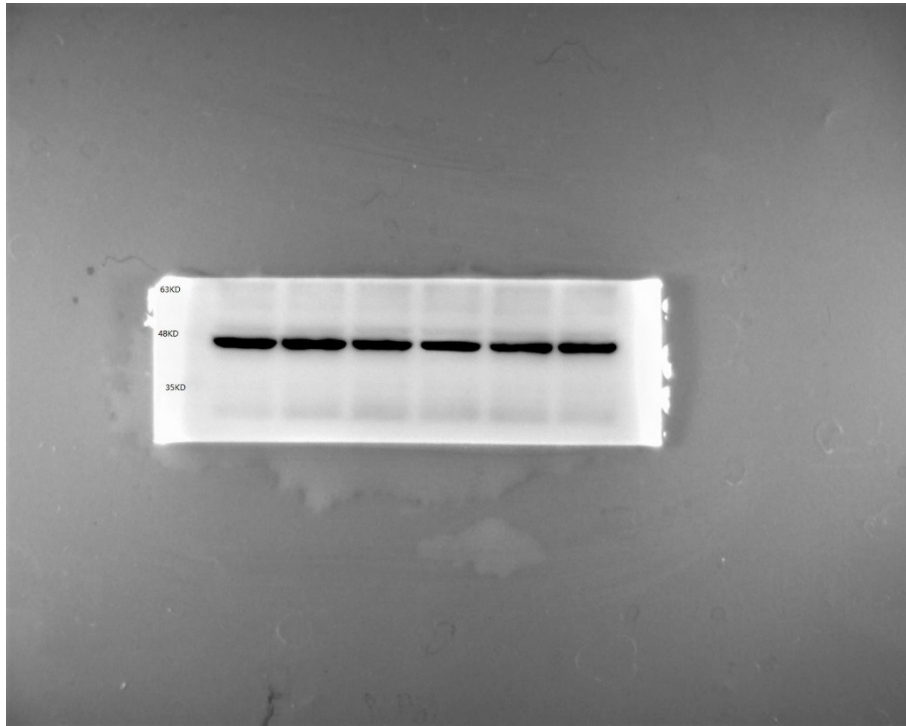

I $\kappa$ B

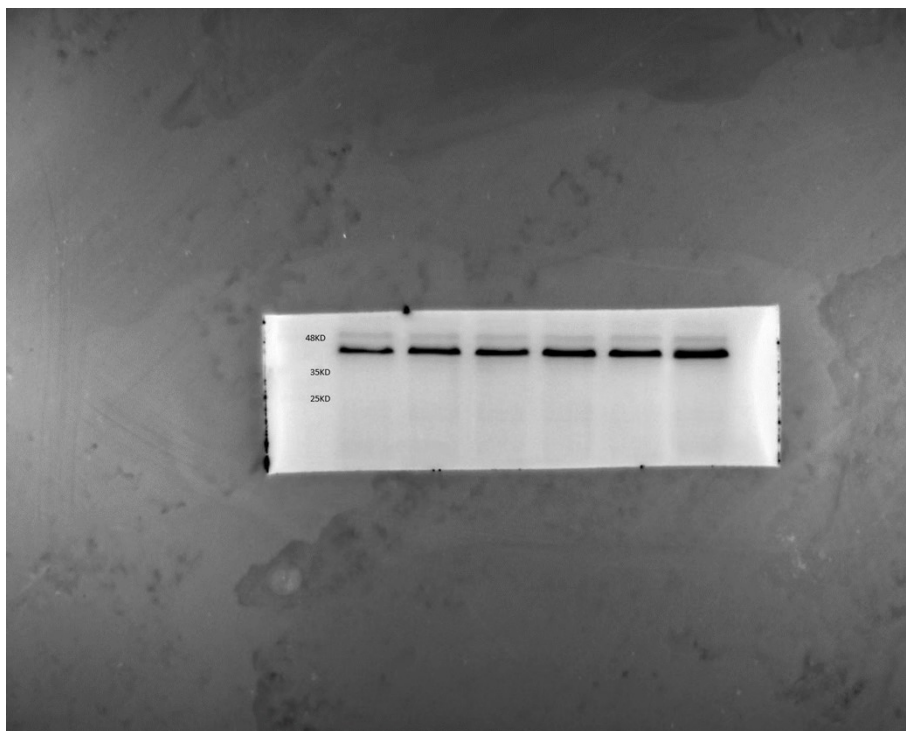

p- IκB

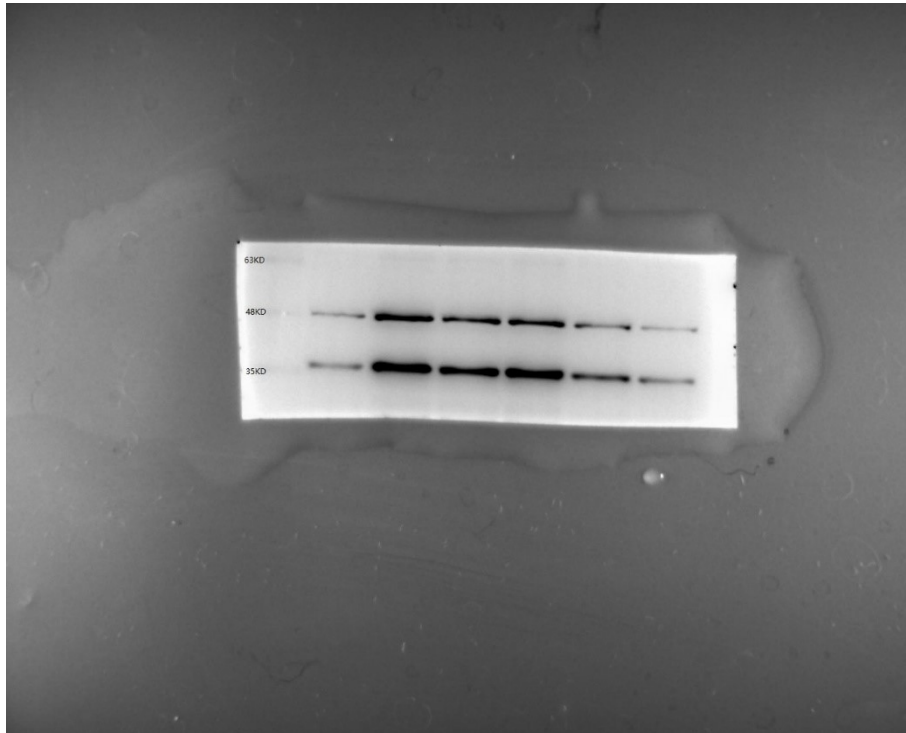

NF-κB

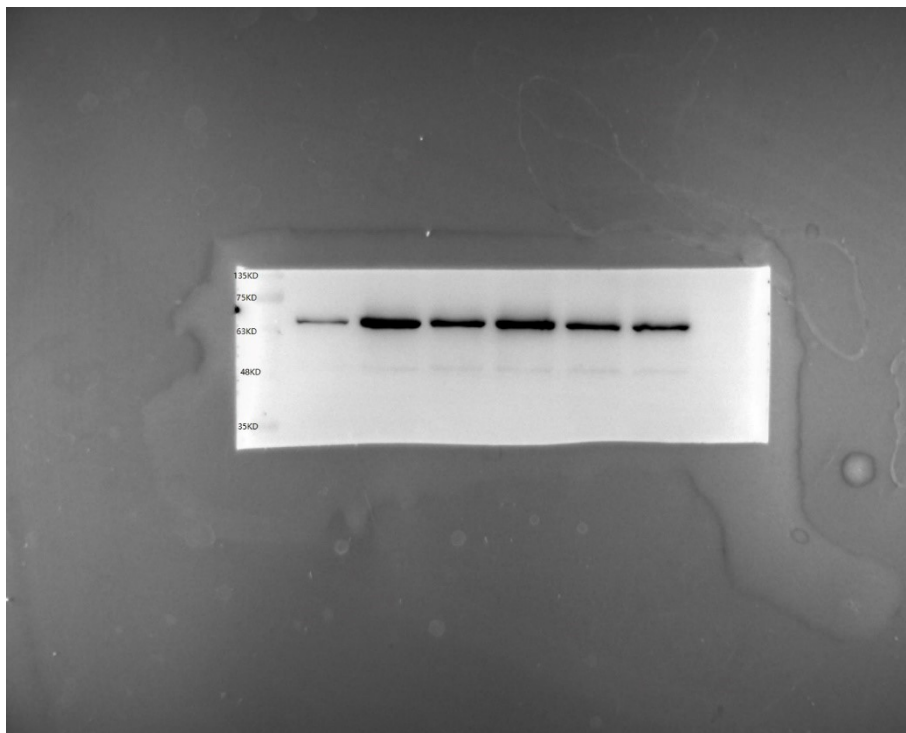

P38

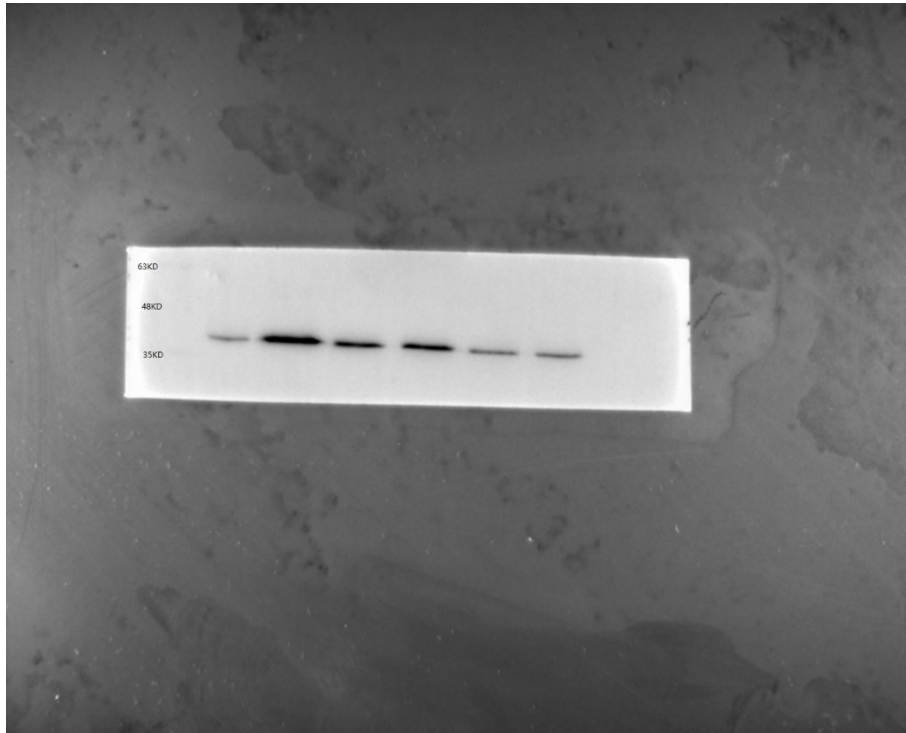

JNK

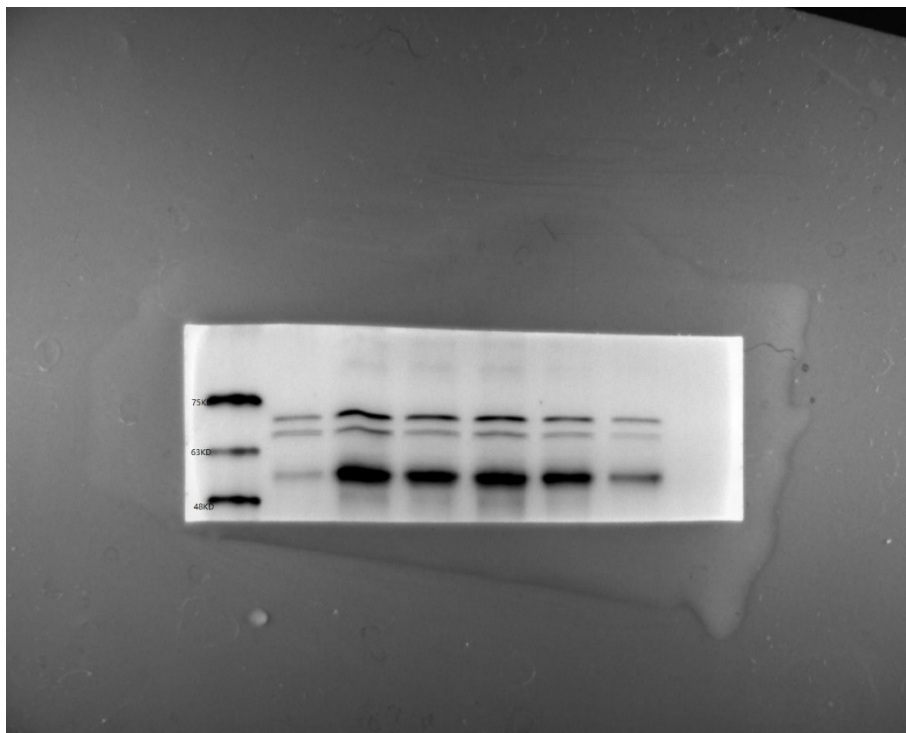

ERK1/2

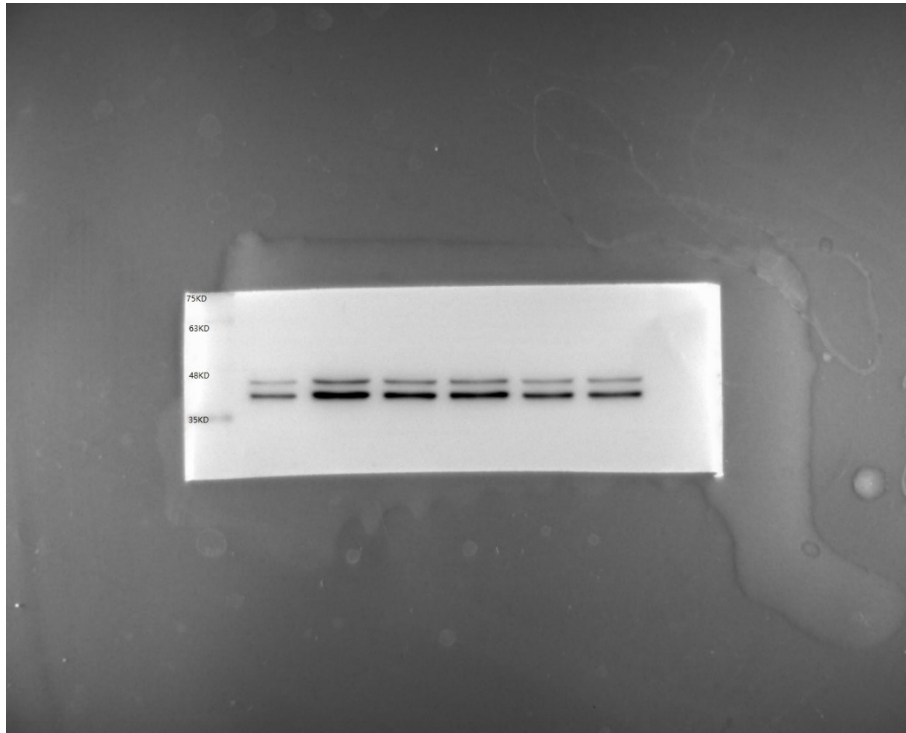

ICAM-1

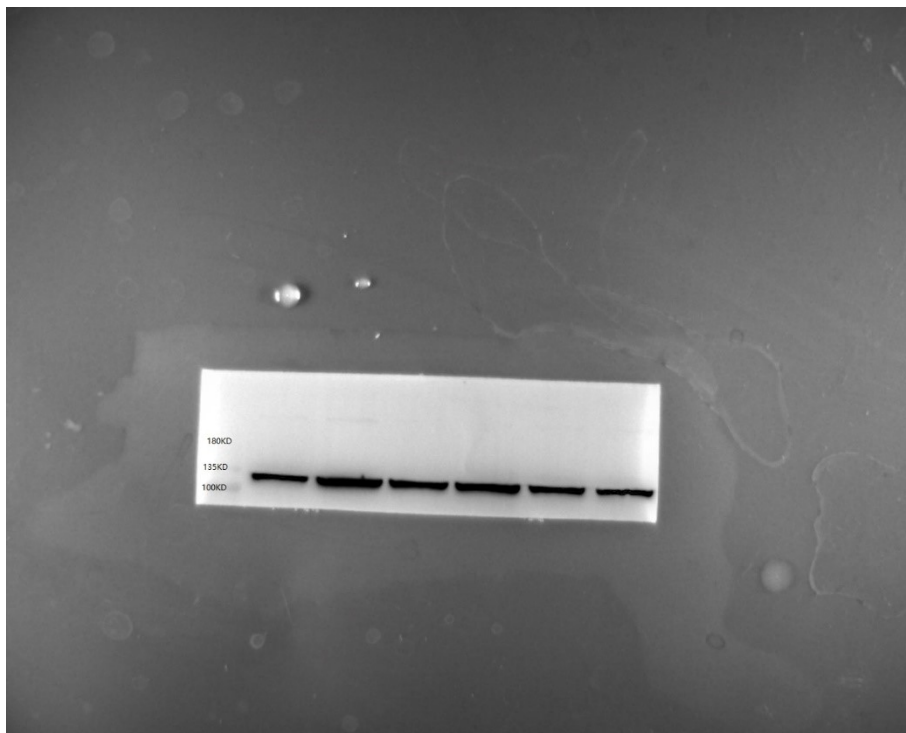

**Figure 6I**

$\beta$ -actin

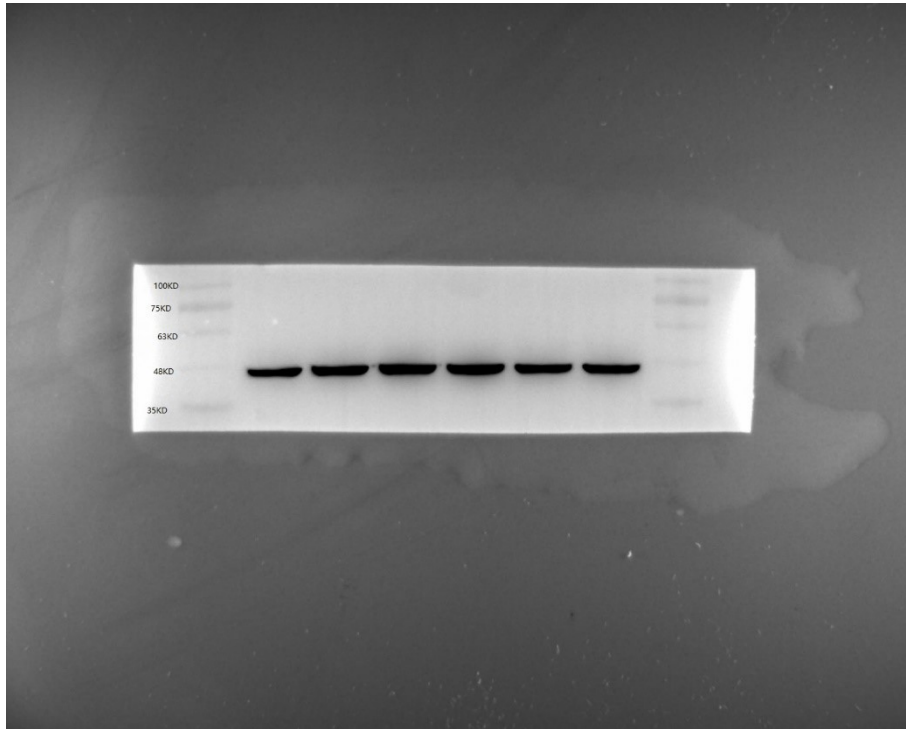

I $\kappa$ B

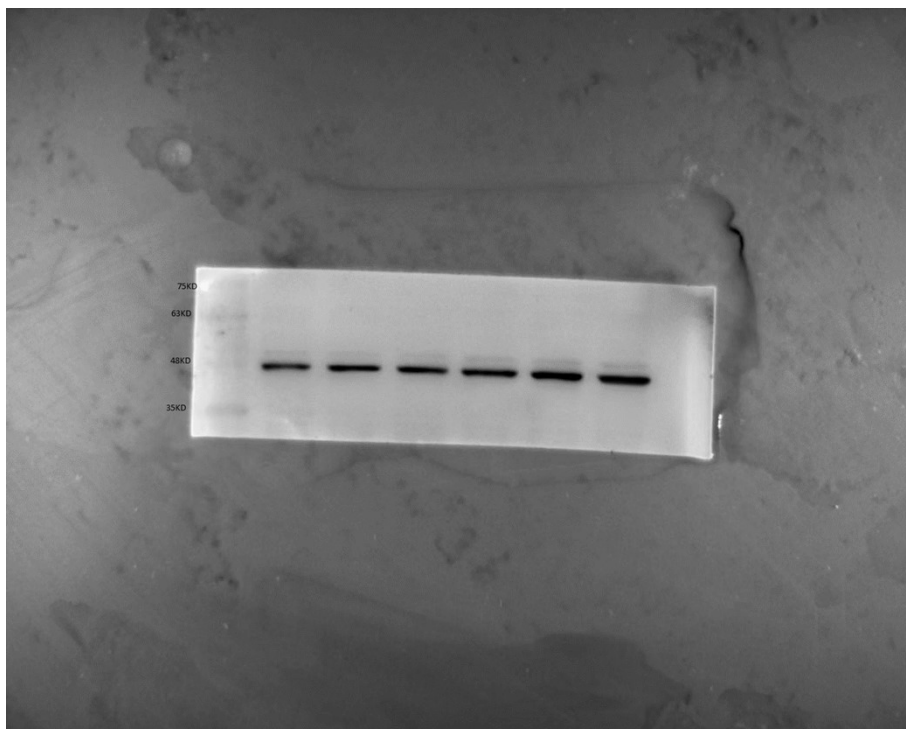

p- IκB

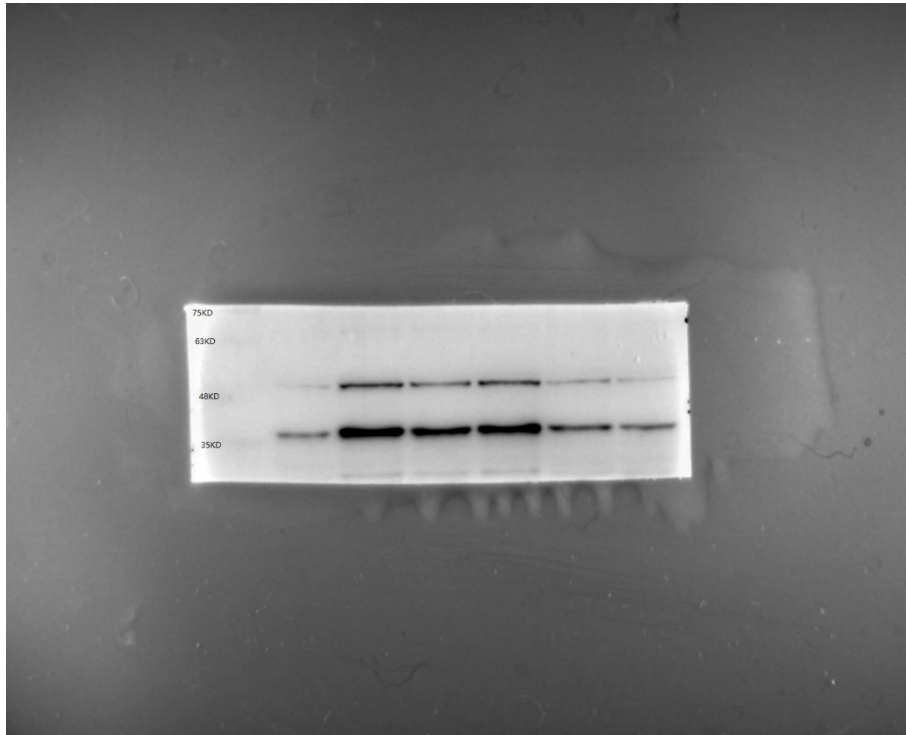

NF-κB

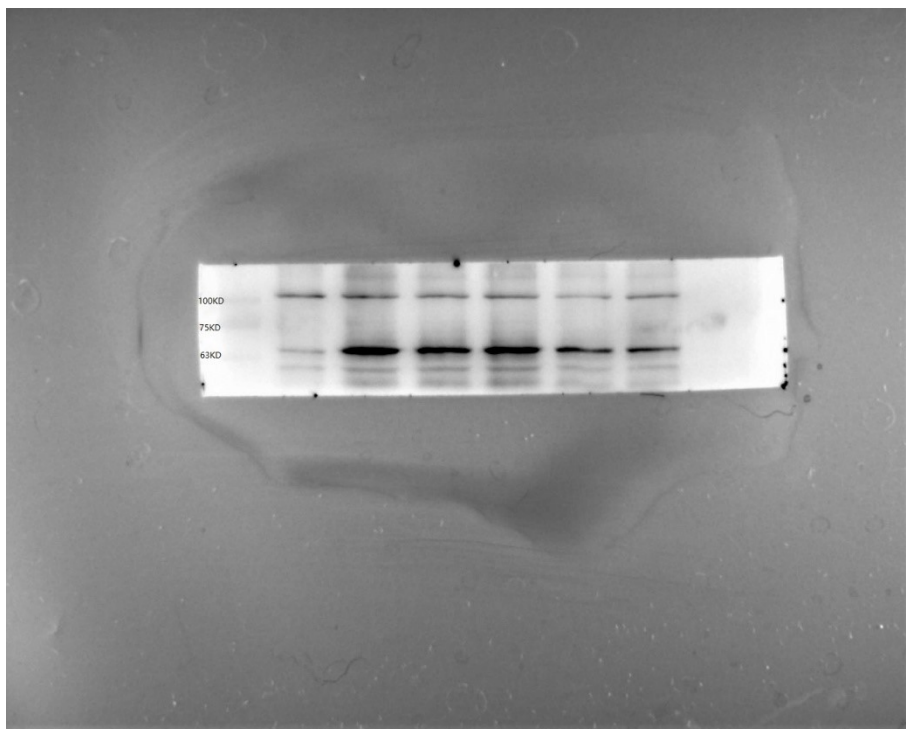



P38

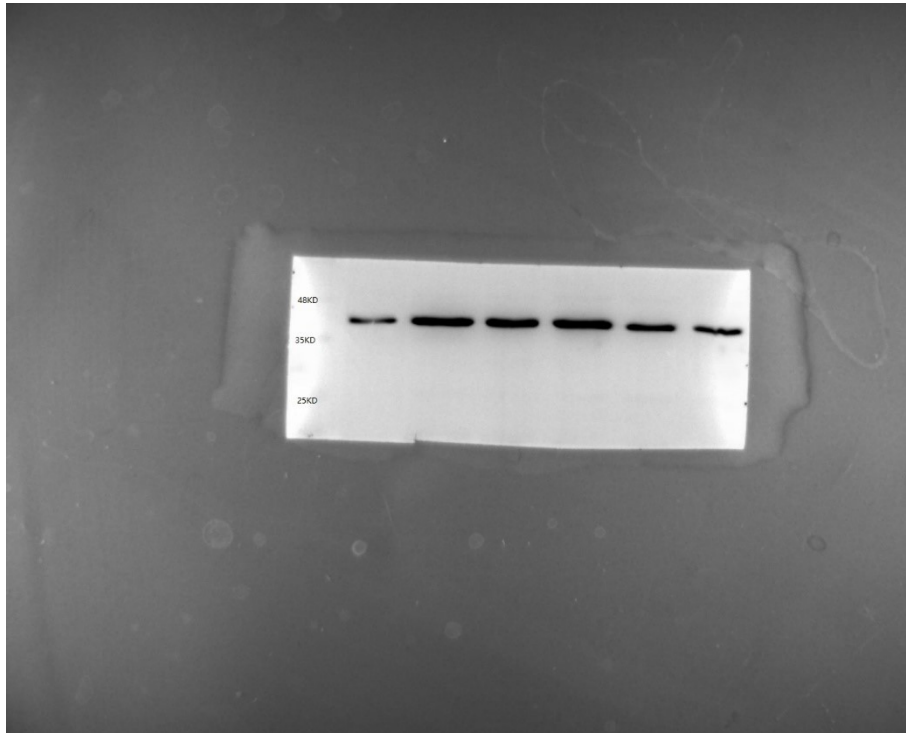

JNK

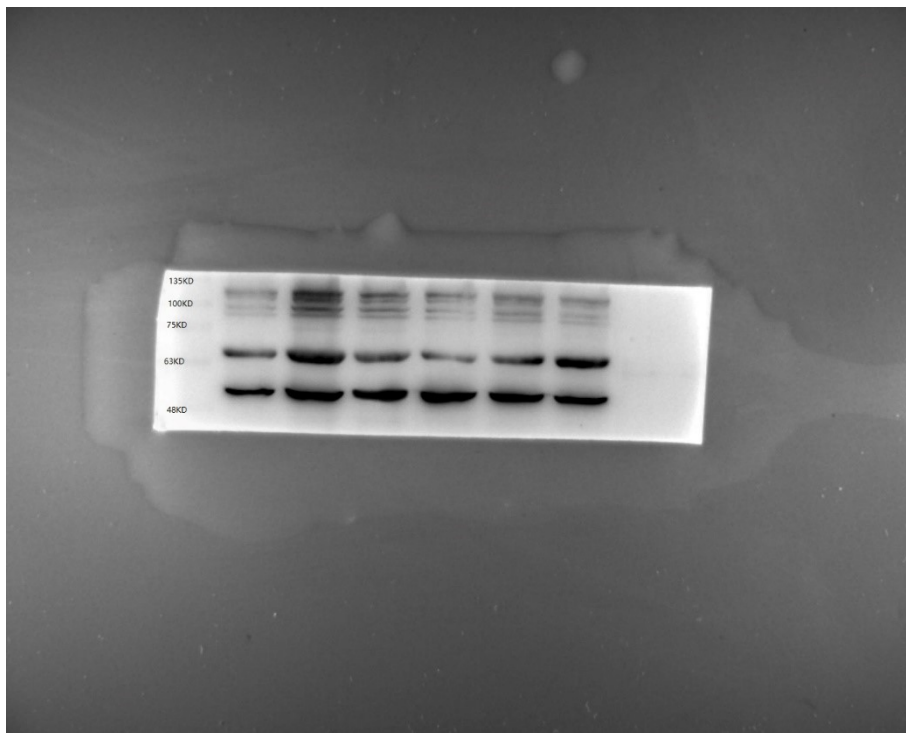

ERK1/2

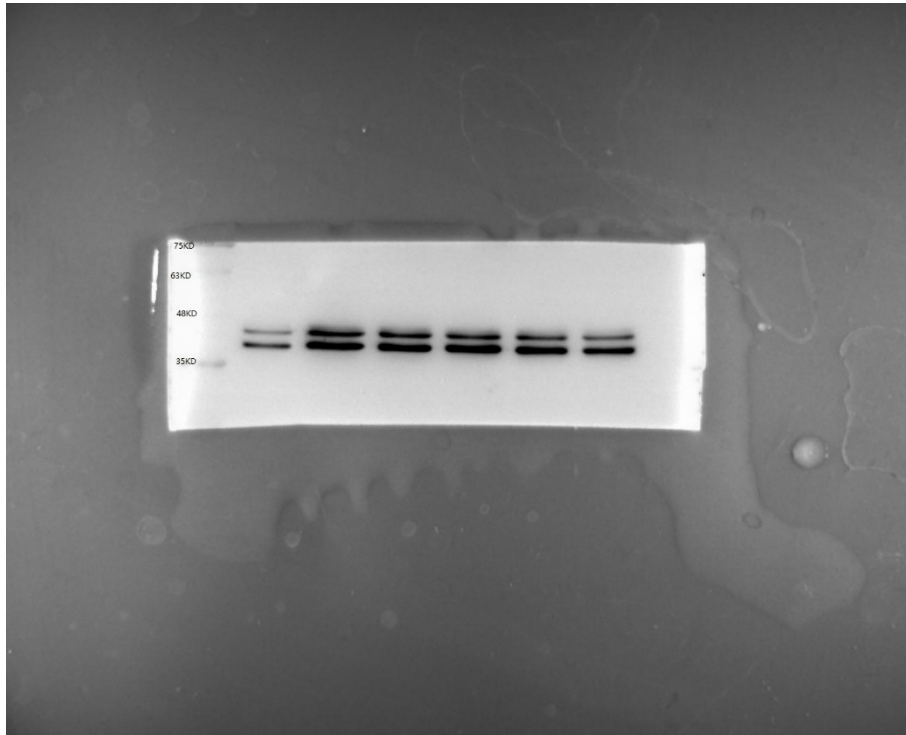

ICAM-1

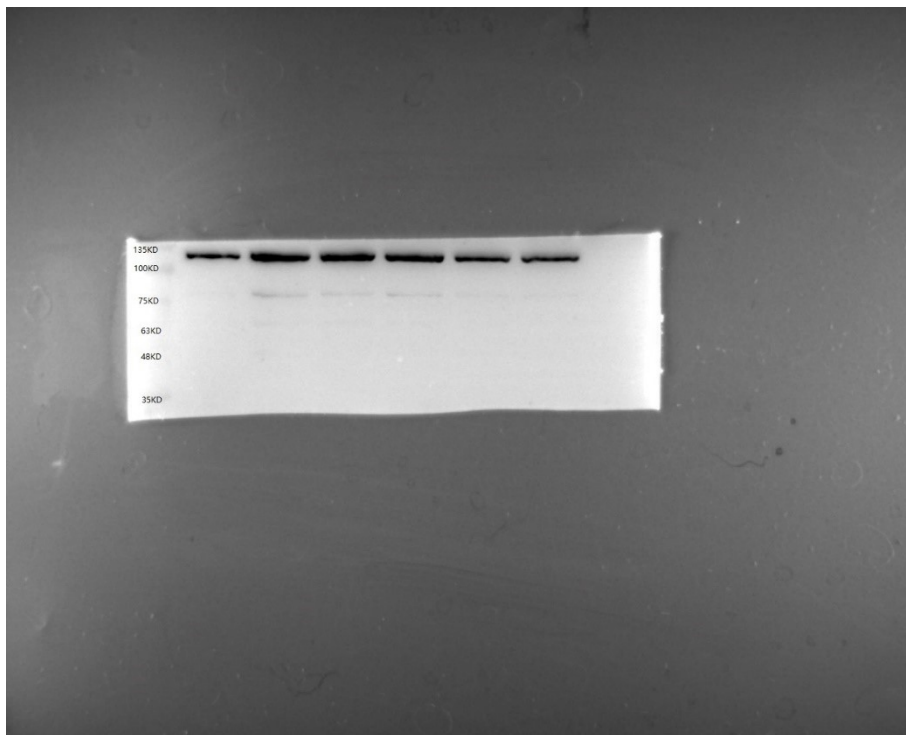

**Figure S13**

NF- $\kappa$ B

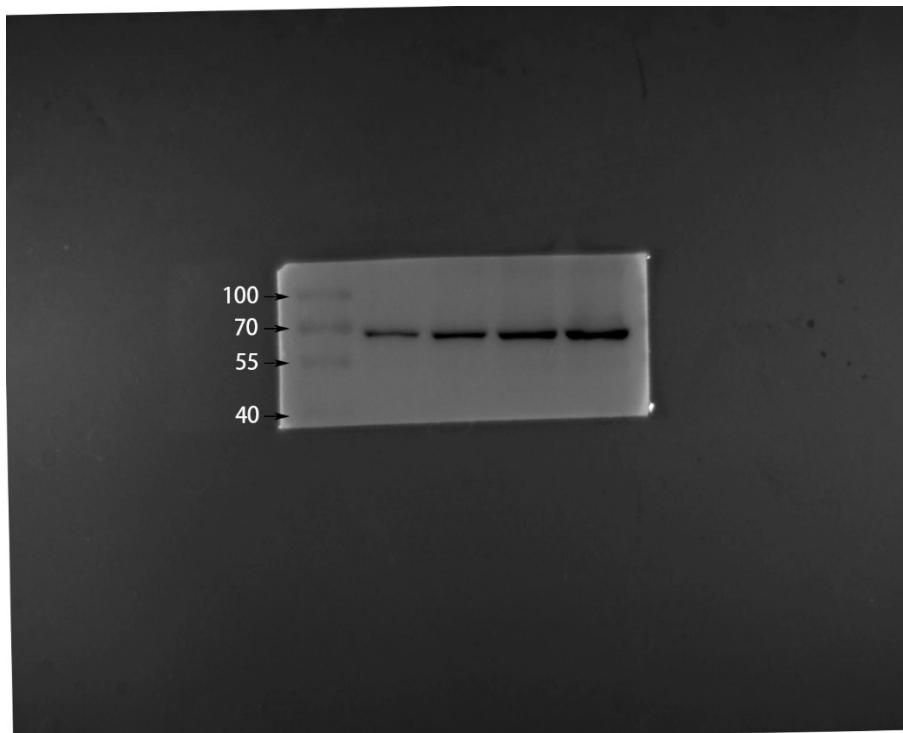

Supplement: d2tb01650h1.pdf [file d2tb01650h1.pdf]
